# Supplementary material for: Characterization of codon usage pattern and evolutionary changes of Human Enterovirus 71 in China
Source: Research Square preprint supplement (doi:10.21203/rs.3.rs-1406591/v1), 2022-03-07
Supplement: Supplementary file 1 [file d9a2cedb29850db67fe2521b.xlsx]

## Sheet: 114Iisolates
Accession no.	Isolation	Year	Length	A%	T%	C%	G%	A3%	T3%	C3%	G3%	(C+G)3%	CAI	ENc
AY465356	China	2003	6582	27.4992	24.9772	23.701	23.8225	23.7577	29.5788	27.7804	18.8831	46.6635	0.737	56.965
FJ360544	China	2008	6582	27.3777	24.8405	23.8225	23.9593	23.1788	29.3283	28.0038	19.4891	47.4929	0.741	56.823
FJ828519	China	2008	6582	27.3017	24.5518	24.1264	24.0201	22.895	28.5241	28.8079	19.7729	48.5809	0.747	56.806
GQ231929	China Taiwan	2004	6582	27.5448	24.7797	23.8225	23.8529	23.4626	29.0445	28.1457	19.3472	47.4929	0.739	57.089
GQ231930	China Taiwan	2004	6582	27.4689	24.8101	23.8074	23.9137	23.2734	29.0445	28.193	19.4891	47.6821	0.74	56.847
GQ231933	China Taiwan	2008	6582	27.484	24.643	23.9897	23.8833	23.1788	28.5714	28.8079	19.4418	48.2498	0.746	56.639
GQ231938	China Taiwan	2005	6582	27.5296	24.7189	23.8377	24.7189	23.5099	28.6187	28.3822	19.4891	47.8713	0.74	57.162
GQ231939	China Taiwan	2004	6582	27.5448	24.7341	23.8681	23.8529	23.4626	28.9026	28.2876	19.3472	47.6348	0.739	57.092
GQ231940	China Taiwan	2004	6582	27.5296	24.8101	23.7922	23.8681	23.4153	29.0445	28.1457	19.3945	47.5402	0.74	56.928
GQ994989	China	2009	6582	27.5448	24.8861	23.7314	23.8377	23.4626	29.1864	28.0511	19.2999	47.351	0.741	56.405
GQ994992	China	2009	6582	27.5144	24.8861	23.6858	23.9137	23.2261	29.2337	27.9092	19.631	47.5402	0.743	56.592
GU396280	China	2009	6582	27.5296	24.6885	23.9745	23.8074	23.5211	28.9162	28.3956	19.1671	47.5627	0.744	56.753
HM003207	China	2008	6582	27.2713	24.7645	23.7922	24.172	23.1898	28.7269	28.301	19.7823	48.0833	0.743	57.072
HM053669	China	2008	6582	27.4689	24.7645	23.8833	23.8833	23.6157	29.0582	28.2537	19.0724	47.3261	0.744	56.733
HM053670	China	2009	6582	27.4081	24.8557	23.777	23.9593	23.368	29.2337	28.0038	19.3945	47.3983	0.742	56.575
HM245928	China	2010	6582	27.5296	24.4607	24.1872	23.8074	23.663	28.8689	28.3483	19.1197	47.4681	0.743	56.625
HM807310	China Taiwan	2005	6582	27.5752	24.6734	23.8377	23.9137	23.368	28.7133	28.2403	19.6783	47.9186	0.74	57.069
HQ188292	China	2008	6582	27.6816	24.7037	23.8377	23.5643	23.9886	28.9386	28.3198	18.753	47.0728	0.741	56.25
HQ400942	China	2008	6582	27.5904	24.7341	23.9897	23.6858	23.7104	29.0582	28.443	18.7885	47.2314	0.742	56.569
HQ423142	China	2009	6582	27.3625	25.0228	23.6402	23.9745	23.0951	29.3895	27.8751	19.6403	47.5154	0.742	56.568
HQ611148	China	2008	6582	27.3929	24.8101	23.8681	23.9289	23.0842	28.9499	28.4295	19.5364	47.9659	0.744	56.98
HQ825317	China	2008	6582	27.5296	24.643	24.0352	23.7922	23.7216	28.5985	28.7879	18.892	47.6799	0.743	56.825
HQ891926	China	2009	6582	27.4233	24.7037	24.0201	23.8529	23.4737	28.9636	28.443	19.1197	47.5627	0.745	56.552
JF799986	China	2009	6582	27.4385	24.3391	24.1568	24.0504	23.3791	28.017	28.8216	19.7823	48.6039	0.746	56.2
JN020147	China	2011	6582	27.3929	24.7037	23.9593	23.9441	23.0951	28.8216	28.4903	19.593	48.0833	0.745	56.561
JN864020	China	2010	6582	27.4689	24.567	24.096	23.8681	23.4264	28.585	28.7269	19.2617	47.9886	0.744	56.85
JQ319054	China	2009	6582	27.56	24.6734	23.9745	23.7922	23.5684	28.9162	28.3956	19.1197	47.5154	0.744	56.739
JQ639384	China	2011	6582	27.56	24.8253	23.8681	23.7466	23.6269	29.072	28.3617	18.9394	47.3011	0.739	56.811
JQ742001	China	2001	6582	27.3929	24.962	23.7314	23.9137	22.9423	29.281	28.1457	19.631	47.7767	0.742	56.545
JQ742002	China	2001	6582	27.636	24.643	23.9745	23.7466	23.6407	28.4161	28.6998	19.2435	47.9433	0.746	56.234
JQ806378	China	2011	6582	27.3777	24.7189	24.0352	23.8681	23.4375	28.6932	28.6932	19.1761	47.8693	0.743	56.786
JX111888	China	2011	6582	27.4385	24.8557	23.777	23.9289	23.2844	29.2475	28.017	19.451	47.4681	0.741	56.836
JX244182	China	2009	6582	27.3777	24.5974	24.0656	23.9593	23.0369	28.6187	28.7133	19.631	48.3444	0.744	56.791
JX678874	China	2003	6582	27.5448	24.962	23.7314	23.7618	23.6157	29.3895	28.017	18.9778	46.9948	0.738	56.935
JX678882	China	2007	6582	27.4081	24.7341	23.8985	23.9593	23.1315	28.7606	28.5241	19.5837	48.1079	0.743	57.104
JX678883	China	2009	6582	27.4689	24.643	24.0201	23.8681	23.3791	28.7743	28.5376	19.309	47.8467	0.745	56.671
JX678885	China	2002	6582	27.8791	24.7949	23.7466	23.5795	24.3499	28.8889	28.0378	18.7234	46.7612	0.739	56.832
JX678886	China	2002	6582	27.5448	24.962	23.6858	23.8074	23.5684	29.4841	27.8277	19.1197	46.9475	0.739	56.866
JX986737	China	2011	6582	27.4385	24.6278	24.0656	23.8681	23.4012	28.6594	28.8015	19.1378	47.9394	0.743	56.784
KC296443	Viet Nam	2012	6582	27.4385	24.8405	23.777	23.9441	23.4264	29.1529	28.017	19.4037	47.4207	0.739	56.612
KC414134	China	2011	6582	27.3929	25.1443	23.5339	23.9289	22.9896	29.7067	27.5307	19.7729	47.3037	0.739	56.967
KC436266	China Hongkong	2005	6582	27.5144	25.0076	23.5491	23.9137	23.663	29.5315	27.4965	19.309	46.8055	0.74	56.733
KC436267	China Hongkong	2006	6582	27.636	24.8557	23.7466	23.7618	23.6518	29.0918	28.0984	19.158	47.2564	0.742	56.782
KC436268	China Hongkong	2007	6582	27.484	24.8253	23.8529	23.8377	23.4626	29.1391	28.2403	19.158	47.3983	0.74	57.051
KC436271	China Hongkong	2009	6582	27.2106	24.9012	23.8225	24.0656	22.3746	29.2337	28.3349	20.0568	48.3917	0.745	56.978
KC954662	China	2007	6582	27.3777	24.7645	23.8985	23.9593	22.9896	28.9026	28.4768	19.631	48.1079	0.744	56.909
KF142412	China	2013	6582	27.6208	24.7037	23.9593	23.7162	23.8523	28.6796	28.6323	18.8358	47.4681	0.743	56.724
KF142413	China	2012	6582	27.3777	24.7645	23.8681	23.9897	23.0478	28.9636	28.2537	19.735	47.9886	0.743	57.103
KF312457	China	1998	6582	27.7423	24.8253	23.7922	23.6402	23.9243	28.9835	28.227	18.8652	47.0922	0.742	56.162
KF444809	China Hongkong	2012	6582	27.7119	24.5822	24.0656	23.6402	24.1836	28.585	28.6796	18.5518	47.2314	0.742	56.336
KF668443	China	2009	6582	27.3929	24.4303	24.2479	23.9289	23.3791	28.2063	29.1055	19.309	48.4146	0.745	56.924
KJ400360	Russia	2013	6582	27.6816	24.6734	23.9593	23.6858	23.947	28.8689	28.3483	18.8358	47.1841	0.746	56.261
KJ508182	China	2012	6582	27.4385	24.9012	23.7162	23.9441	23.368	29.3756	27.7673	19.4891	47.2564	0.743	56.814
KP289417	China	2013	6582	27.3929	24.643	23.8377	24.1264	23.1534	28.3617	28.5985	19.8864	48.4848	0.747	56.762
KP289432	China	2013	6582	27.5904	24.8405	23.9593	23.6098	23.6855	28.8489	28.5647	18.901	47.4657	0.744	56.556
KT345959	China	2014	6582	27.5296	25.0684	23.625	23.777	23.663	29.6261	27.8277	18.8831	46.7108	0.741	57.108
KT345960	China	2014	6582	27.5144	24.8101	23.8681	23.8074	23.663	28.9636	28.3483	19.0251	47.3734	0.739	57.187
KT428646	China	2014	6582	27.6816	24.8557	23.7922	23.6706	24.0416	29.4368	27.8277	18.6938	46.5215	0.74	57.211
KU254596	China	2014	6582	27.5448	24.643	24.0049	23.8074	23.6098	28.4166	28.9821	18.9915	47.9736	0.741	57.022
KU936121	China	2014	6582	27.56	24.7037	24.0352	23.701	23.663	28.9162	28.6323	18.7885	47.4207	0.745	57.065
KU936123	China	2014	6582	27.3321	24.8557	23.8681	23.9441	22.9058	29.5315	28.017	19.5457	47.5627	0.741	56.573
KU936124	China	2014	6582	27.4689	24.7797	23.9137	23.8377	23.5433	29.0857	28.3752	18.9957	47.3709	0.742	56.982
KX752783	China	2015	6582	27.7575	24.7037	23.8681	23.6706	24.3729	28.585	28.3956	18.6465	47.0421	0.74	56.655
KY425527	China	2013	6582	27.5904	24.5214	24.0808	23.8074	23.7577	28.3956	28.7743	19.0724	47.8467	0.742	56.946
MF362981	China	2010	6582	27.6967	24.3391	24.2479	23.7162	23.9357	27.9565	29.2337	18.8742	48.1079	0.745	56.556
MF431793	China	2013	6582	27.56	24.643	24.0049	23.7922	23.5572	28.8079	28.4768	19.158	47.6348	0.743	56.903
MG207962	China	2017	6582	27.4385	24.9164	23.7618	23.8833	23.1061	29.4034	27.983	19.5076	47.4905	0.741	57.048
MG207963	China	2017	6582	27.4081	24.962	23.7162	23.9137	23.3143	29.3447	27.7778	19.5632	47.3409	0.74	57.088
MG431943	China	2017	6582	27.4537	24.7645	23.9745	23.8074	23.4264	29.1529	28.3956	19.0251	47.4207	0.744	56.768
MG520666	China	2017	6582	27.4689	24.962	23.6402	23.9289	23.4737	29.7681	27.3071	19.451	46.7582	0.743	56.617
MG756691	China Taiwan	2016	6582	27.5448	24.7645	23.9441	23.7466	23.7577	29.0582	28.3956	18.7885	47.1841	0.74	56.826
MG756692	China Taiwan	2016	6582	27.3473	24.8101	23.9137	23.9289	23.1898	29.2948	28.159	19.3564	47.5154	0.74	56.853
MG756693	China Taiwan	2015	6582	27.4233	24.7341	23.9897	23.8529	23.3791	29.0582	28.3956	19.1671	47.5627	0.74	56.742
MG756719	China Taiwan	2010	6582	27.56	24.7037	23.9593	23.777	23.663	28.8689	28.3483	19.1197	47.4681	0.744	56.459
MG773124	China	2014	6582	27.636	24.7645	23.9137	23.6858	23.8997	28.8216	28.4903	18.7885	47.2788	0.743	56.585
MG773125	China	2014	6582	27.4233	24.8101	23.8529	23.9137	23.3318	28.9162	28.3956	19.3564	47.752	0.742	56.881
MW655540	China	2019	6582	27.3473	24.5366	24.0808	24.0352	23.2844	28.7269	28.443	19.5457	47.9886	0.741	57.428
MT708802	China	2019	6582	27.6208	24.4455	23.625	24.3087	24.0171	27.9962	27.5699	20.4169	47.9867	0.745	56.667
MT708801	China	2019	6582	27.6208	24.4303	23.6402	24.3087	24.0171	27.9488	27.6172	20.4169	48.0341	0.746	56.588
MT708805	China	2019	6582	27.4081	24.6885	24.0049	23.8985	23.2844	29.0109	28.443	19.2617	47.7047	0.738	57.538
MH716359	China	2015	6582	27.2106	24.7797	23.6098	24.3999	22.7854	28.7068	27.8541	20.6537	48.5078	0.749	56.192
MG756754	China Taiwan	2013	6582	27.484	24.6582	23.7162	24.1416	23.5322	28.5511	27.8409	20.0758	47.9167	0.747	56.314
MG756695	China Taiwan	2015	6582	27.089	24.8253	23.6554	24.4303	22.5012	28.991	27.6646	20.8432	48.5078	0.749	56.039
KU647000	China	2014	6582	27.165	24.7949	23.6706	24.3695	22.9275	28.612	28.0436	20.4169	48.4604	0.749	56.193
KJ686302	Viet Nam	2012	6582	27.1042	24.6885	23.7922	24.4151	22.738	28.5173	28.1857	20.559	48.7447	0.752	55.993
KF154354	China Taiwan	2011	6582	27.4081	24.6278	23.7922	24.172	23.3428	28.5038	28.0303	20.1231	48.1534	0.748	56.101
KF154355	China Taiwan	2011	6582	27.4689	24.6734	23.7314	24.1264	23.5795	28.5511	27.9356	19.9337	47.8693	0.748	56.356
KF134486	China Taiwan	2011	6582	27.4537	24.6582	23.8074	24.0656	23.6157	28.585	28.017	19.7823	47.7993	0.75	56.033
JN964686	China	2009	6582	27.3777	24.8253	23.701	24.096	23.4375	28.7405	28.0303	19.7917	47.822	0.749	56.073
HQ189392	Hungary	1978	6582	27.6816	25.2051	23.1541	23.9593	23.7441	29.9526	26.3981	19.9052	46.3033	0.746	56.056
DQ341368	Malaysia	1997	6582	27.6208	24.7797	23.7618	23.8377	23.5795	29.1193	27.8883	19.4129	47.3011	0.749	56.662
AF316321	Singapore	2000	6582	27.3473	24.7341	23.6554	24.2631	23.2008	28.5985	27.7462	20.4545	48.2008	0.749	56.567
AB550337	Japan	2010	6582	27.4537	24.6734	23.701	24.172	23.5433	28.4699	27.8541	20.1326	47.9867	0.75	56.364
AF304458	China Taiwan	1998	6582	27.6208	24.2328	23.6554	24.491	24.0644	26.6698	28.3752	20.8906	49.2658	0.749	56.421
AF304459	China Taiwan	1998	6582	27.6208	24.1416	23.7314	24.5062	24.1118	26.3382	28.612	20.9379	49.55	0.749	56.407
DQ341355	South Korea	2000	6582	27.5296	24.643	23.3516	24.4758	23.6493	27.9621	27.3934	20.9953	48.3886	0.743	56.406
DQ341358	Malaysia	2000	6582	27.7727	24.4758	23.4123	24.3391	24.4087	27.3888	27.5307	20.6717	48.2025	0.741	56.762
DQ381846	Australia	1999	6582	27.636	24.1568	23.7618	24.4455	24.2065	26.433	28.612	20.7485	49.3605	0.743	57.068
GU434678	China	2009	6582	27.9246	24.7797	23.3364	23.9593	24.775	27.9488	27.4751	19.801	47.2762	0.743	56.236
KC436270	China Hongkong	2008	6582	27.2865	24.2176	23.777	24.7189	23.2117	26.5277	28.7068	21.5538	50.2605	0.745	56.664
KF501389	China	2010	6582	27.9702	24.7037	23.3668	23.9593	24.858	27.8409	27.4621	19.839	47.3011	0.744	56.316
KP274876	China Taiwan	2011	6591	27.5752	24.3087	23.6858	24.567	24.0776	26.7739	28.2876	20.8609	49.1485	0.748	56.387
MG214681	China	2015	6582	27.2713	24.2935	23.7162	24.7189	22.9858	26.9668	28.3886	21.6588	50.0474	0.745	57.042
MG672480	Senegal	2014	6582	27.56	24.3391	23.8681	24.2328	23.5433	26.9541	28.8015	20.7011	49.5026	0.749	57.133
MG976581	USA	2016	6582	27.1194	24.6126	23.4427	24.8253	22.654	27.5829	27.9147	21.8483	49.763	0.75	56.597
MH718269	USA	2018	6582	27.9095	24.3543	23.6402	24.096	24.6802	27.8541	27.5225	19.9432	47.4657	0.748	56.083
MK800119	USA	2018	6582	27.8943	24.4303	23.5795	24.096	24.3013	27.9962	27.712	19.9905	47.7025	0.747	56.169
MT081375	USA	2018	6582	27.8943	24.3999	23.625	24.0808	24.6329	27.9488	27.4751	19.9432	47.4183	0.748	56.105
MT708803	China	2019	6582	27.5904	24.4455	23.625	24.3391	23.9697	27.9015	27.6646	20.4642	48.1288	0.746	56.678
MW030642	China	2019	6582	27.5448	24.5214	23.5339	24.3999	23.8749	28.2331	27.2856	20.6063	47.892	0.743	56.912
MW655539	China	2019	6582	27.5144	24.4455	24.1568	23.8529	23.8276	28.4225	28.7068	19.0431	47.7499	0.739	57.435
MT708800	China	2019	6582	27.5448	24.4455	23.625	24.3847	23.7802	27.9962	27.5699	20.6537	48.2236	0.747	56.656
MT708804	China	2019	6582	27.3777	24.7645	23.8833	23.9745	23.1425	29.1529	28.1117	19.593	47.7047	0.74	56.833
MT708799	China	2019	6582	27.5904	24.4455	23.625	24.3391	23.9223	27.9962	27.5699	20.5116	48.0815	0.745	56.626
